# Supplementary material for: Electrochemistry-related aspects of safety of graphene-based non-aqueous electrochemical supercapacitors: a case study with MgO-decorated few-layer graphene as an electrode material
Source: Royal Society of Chemistry journal article supplement (doi:10.1039/c9nj00991d), 2019-01-01
Supplement: c9nj00991d1.pdf [file c9nj00991d1.pdf]

### Rietveld Refinement of FLG/MgO

Rietveld refinement parameters of FLG/MgO

| Structure                             | FLG                              | MgO              |
|---------------------------------------|----------------------------------|------------------|
| Evaluated Lattice parameters          | a = 2.311(3) Å<br>c = 6.904(0) Å | a = 4.217(6) Å   |
| Average Crystallite size (Lorentzian) | 6.8 nm                           | 11.0 nm          |
| Strain L                              | 5.000                            | 0.0001           |
| R-Bragg                               | 0.062                            | 0.257            |
| Wt%-Rietveld                          | 4.21                             | 95.79            |
| Space group                           | P63/mmc (194)                    | Fm-3m (225)      |
| JCPDS file Number                     | JCPDS # 3-65-6212                | JCPDS # 1-75-447 |
| Lattice parameters                    | a = 2.4640 Å<br>c = 6.7110       | a = 4.220 Å      |

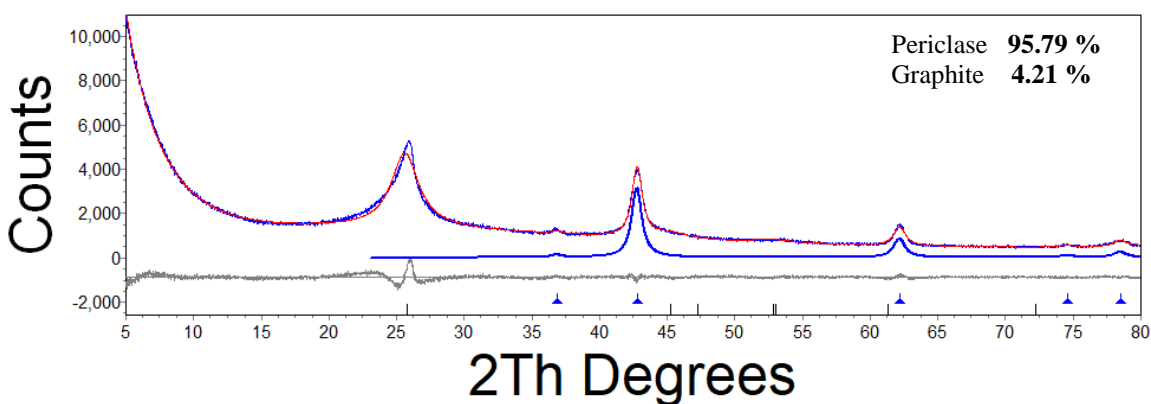

| h | k | l | m  | d       | 2th      | F <sup>2</sup> |
|---|---|---|----|---------|----------|----------------|
| 1 | 1 | 1 | 8  | 2.43504 | 36.88337 | 9.860          |
| 0 | 0 | 2 | 6  | 2.10880 | 42.84928 | 381.519        |
| 0 | 2 | 2 | 12 | 1.49115 | 62.20623 | 259.303        |
| 3 | 1 | 1 | 24 | 1.27166 | 74.56474 | 48.068         |
| 2 | 2 | 2 | 8  | 1.21752 | 78.49604 | 133.782        |
